# Supplementary material for: Decellularized Lung Extracellular Matrix Scaffold Promotes Human Embryonic Stem Cell Differentiation towards Alveolar Progenitors
Source: PubMed Central journal article supplement — Cell J. 2023 Jun 28;25(6):372–82. doi: 10.22074/CELLJ.2023.563370.1148 (PMC10331443; doi:10.22074/cellj.2023.563370.1148), 2023-06-28
Supplement: Cell-J-25-372-s01.pdf [file Cell-J-25-372-s01.pdf]

## Supplementary Information for

# Decellularized Lung Extracellular Matrix Scaffold Promotes Human Embryonic Stem Cell Differentiation towards Alveolar Progenitors

Afshin Noori, D.V.M.<sup>1,2</sup>, Mohammad Reza Mokhber Dezfouli, D.V.M., D.V.Sc.<sup>1,3</sup>, Sarah Rajabi, Ph.D.<sup>2,4</sup>, Fatemeh Ganji, Ph.D.<sup>5</sup>, Zahra Ghezelayagh, Ph.D.<sup>2,6</sup>, Elie El Agha, Ph.D.<sup>7</sup>, Hossein Baharvand, Ph.D.<sup>2,6</sup>, Sirous Sadeghian Chaleshtori, D.V.M., D.V.Sc.<sup>1,3\*</sup>, Yaser Tahamtani, Ph.D.<sup>2,8\*</sup>

1. Department of Internal Medicine, Faculty of Veterinary Medicine, University of Tehran, Tehran, Iran
2. Department of Stem Cells and Developmental Biology, Cell Science Research Center, Royan Institute for Stem Cell Biology and Technology, ACECR, Tehran, Iran
3. Institute of Biomedical Research, University of Tehran, Tehran, Iran
4. Department of Cell Engineering, Cell Science Research Center, Royan Institute for Stem Cell Biology and Technology, ACECR, Tehran, Iran
5. Department of Tissue Engineering and Regenerative Medicine, Faculty of Advanced Technologies in Medicine, Iran University of Medical Sciences, Tehran, Iran
6. Faculty of Sciences and Advanced Technologies in Biology, University of Science and Culture, ACECR, Tehran, Iran
7. Department of Internal Medicine, Universities of Giessen and Marburg Lung Center (UGMLC), Institute for Lung Health (ILH), Cardio-Pulmonary Institute (CPI), Member of the German Center for Lung (DZL), Justus-Liebig University Giessen, Giessen, Germany
8. Reproductive Epidemiology Research Center, Royan Institute for Reproductive Biomedicine, ACECR, Tehran, Iran

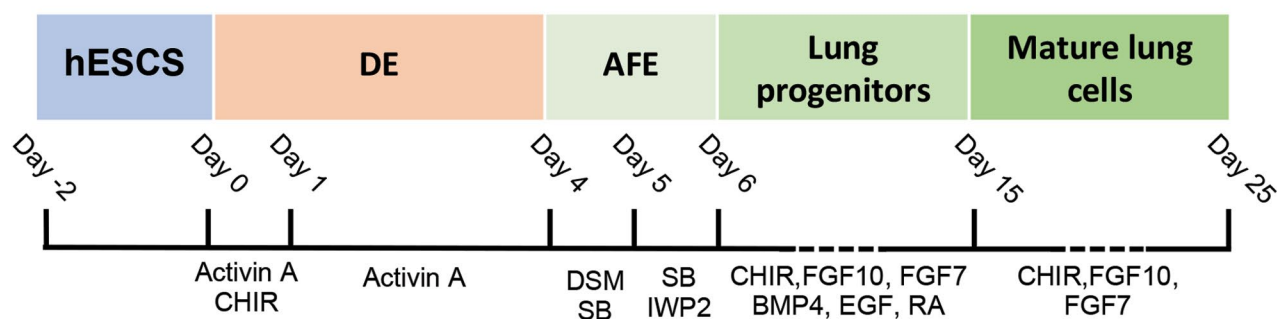

**Fig.S1:** The day-dependent addition of all the small molecules and growth factors used in the differentiation protocol. hESCs; Human embryonic stem cells, DE; Definitive endoderm, and AFE; Anterior foregut endoderm.

Received: 12/October/2022, Revised: 02/April/2023, Accepted: 16/April/2023

\*Corresponding Addresses: P.O.Box: 1419963114, Department of Internal Medicine, Faculty of Veterinary Medicine, University of Tehran, Tehran, Iran  
 P.O.Box: 16635-148, Department of Stem Cells and Developmental Biology, Cell Science Research Center, Royan Institute for Stem Cell Biology and Technology, ACECR, Tehran, Iran  
 Emails: s.sadeghian@ut.ac.ir, y.tahamtani@royan-rc.ac.ir

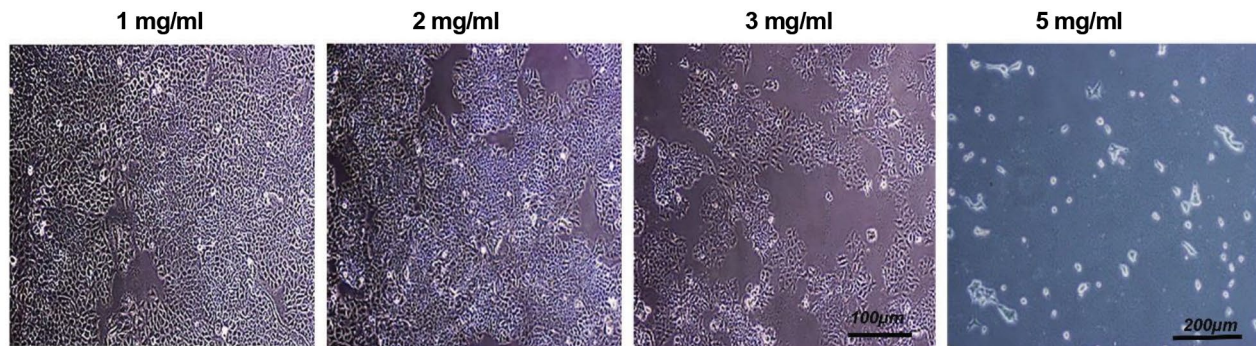

**Fig.S2:** Culture of A549 cell line on lung extracellular matrix (ECM)-derived hydrogel at concentrations of 1, 2, 3 and 5 mg/ml. Phase contrast images were taken after 6 days.

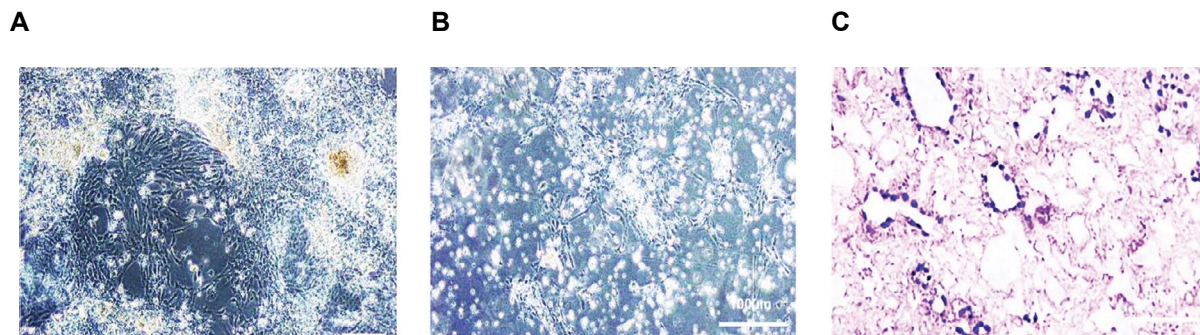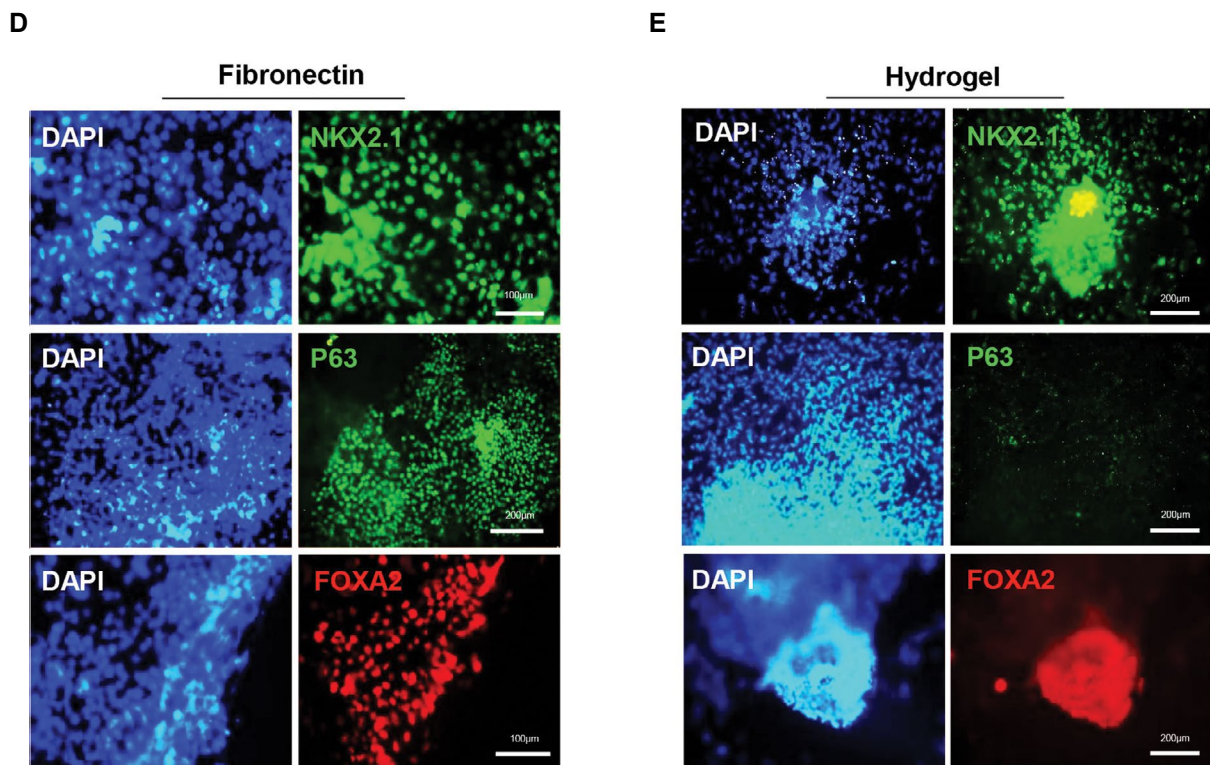

**Fig.S3:** Morphology and phenotypically characterization of human pluripotent stem cell (hPSC)-derived lung progenitor cells on fibronectin and hydrogel coating plates at day 15 of differentiation. Phase-contrast images of heterogeneous population of differentiated cells on **A.** Fibronectin and **B.** Hydrogel. **C.** H&E staining of scaffold after recellurization with endoderm cells at day 15 indicates that alveolar structures have been lined with epithelial cells. **D.** immunostaining of cells for NKX2-1, P63, and FOXA2 markers on fibronectin and **E.** On ECM lung hydrogel.

**Table S1:** Real time polymerase chain reaction (RT-PCR) primers

| TaqMan primers | Primer sequence (5'-3')                                    |
|----------------|------------------------------------------------------------|
| <i>GAPDH</i>   | F: GACAACAGCCTCAAGATCATCAG<br>R: ATGGCATGGACTGTGGTCATGAG   |
| <i>NKX2</i>    | F: GCATGAACATGAGCGGCAT<br>R: CGACAGGTA CTCTGTTGCTTG        |
| <i>SOX2</i>    | F: CCCAGCAGACTTCACATGT<br>R: CCTCCCATTTCCCTCGTTTT          |
| <i>MUC5A</i>   | F: ATTGCTATTATGCCCTGTGTA<br>R: TGGTGGACGGACAGTCACT         |
| <i>FOXJ1</i>   | F: GCATAAGCGCAAACAGCCG<br>R: TCGAAGATGGCCTCCCAGT           |
| <i>SOX9</i>    | F: GAGGAAGTCGGTGAAGAACG<br>R: GTTTTGGGGGTGGTGGGT           |
| <i>SFTPC</i>   | F: CCTTCTTATCGTGGTGGTGGTGGT<br>R: TCTCCGTGTGTTTCTGGCTCATGT |
